# Supplementary material for: The association between sugar-sweetened beverages and milk intake with emotional and behavioral problems in children with autism spectrum disorder
Source: PubMed Central journal article supplement (PMC9386187; doi:10.3389/fnut.2022.927212), 2022-08-04
Supplement: Table_1.pdf [file Table_1.pdf]

**Table S1.** Crude model of association of SSBs, milk intake and their interactive effects on emotional and behavioral problems among all participants

| Crude model                                 | Emotional symptom   | Conduct problem     | Hyperactivity/Inattention | Peer relationship problem | Prosocial behavior  |
|---------------------------------------------|---------------------|---------------------|---------------------------|---------------------------|---------------------|
|                                             | $\beta$ (95%CI)     | $\beta$ (95%CI)     | $\beta$ (95%CI)           | $\beta$ (95%CI)           | $\beta$ (95%CI)     |
| <b>SSBs</b>                                 |                     |                     |                           |                           |                     |
| <b>SSBs intake (N=314) <sup>a</sup></b>     |                     |                     |                           |                           |                     |
| 1-2 times/week                              | -0.18(-1.01, 0.64)  | 0.72(0.03, 1.41)    | 0.10(-0.96, 1.16)         | -0.21(-0.90, 0.48)        | 0.58(-0.34, 1.50)   |
| >2 times/week                               | 0.91(-0.15, 1.96)   | 0.87(-0.02, 1.75)   | 0.32(-1.04, 1.69)         | 0.35(-0.54, 1.24)         | -0.36(-1.54, 0.82)  |
| <i>p</i> for trend                          | 0.639               | 0.538               | 0.090                     | 0.078                     | 0.289               |
| <b>Group (N=314) <sup>b</sup></b>           | -0.10(-0.86, 0.65)  | -0.13(-0.76, 0.50)  | -2.38(-3.36, -1.41)       | -3.50(-4.14, -2.87)       | 2.45(1.60, 3.29)    |
| <i>p</i> value                              | 0.332               | 0.450               | 0.001                     | <b>&lt;0.001</b>          | <b>&lt;0.001</b>    |
| <b>SSBs*Group (N=314) <sup>c</sup></b>      |                     |                     |                           |                           |                     |
| 1-2 times/week*Group                        | -0.11(-1.11, 0.89)  | -0.40(-1.23, 0.44)  | 0.47(-0.82, 1.76)         | 0.33(-0.51, 1.17)         | -0.88(-2.00, 0.24)  |
| <i>p</i> value                              | 0.830               | 0.352               | 0.475                     | 0.440                     | 0.124               |
| >2 times/week*Group                         | -1.38(-2.74, -0.02) | -1.20(-2.34, -0.07) | 0.30(-1.45, 2.05)         | -0.21(-1.35, 0.93)        | 0.44(-1.08, 1.96)   |
| <i>p</i> value                              | <b>0.046</b>        | <b>0.038</b>        | 0.735                     | 0.715                     | 0.571               |
| <b>Milk</b>                                 |                     |                     |                           |                           |                     |
| <b>Milk intake (N=314) <sup>d</sup></b>     |                     |                     |                           |                           |                     |
| 4-7 times/week                              | -0.31(-1.16, 0.54)  | 0.78(0.06, 1.50)    | 0.01(-1.09, 1.11)         | -0.09(-0.81, 0.62)        | 0.18(-0.76, 1.12)   |
| >7 times/week                               | -0.99(-2.05, 0.08)  | 0.30(-0.60, 1.20)   | -0.25(-1.63, 1.14)        | -0.80(-1.70, 0.10)        | 1.60(0.42, 2.78)    |
| <i>p</i> for trend                          | 0.232               | 0.908               | 0.253                     | 0.131                     | <b>0.025</b>        |
| <b>Group (N=314) <sup>b</sup></b>           | -0.19(-1.12, 0.74)  | -0.01(-0.80, 0.77)  | -1.73(-2.94, -0.53)       | -3.53(-4.32, -2.75)       | 2.98(1.95, 4.01)    |
| <i>p</i> value                              | 0.695               | 0.971               | <b>0.005</b>              | <b>&lt;0.001</b>          | <b>&lt;0.001</b>    |
| <b>Milk*Group (N=314) <sup>e</sup></b>      |                     |                     |                           |                           |                     |
| 4-7 times/week*Group                        | -0.52(-1.63, 0.60)  | -0.85(-1.80, 0.09)  | -0.54(-2.00, 0.91)        | -0.00(-0.95, 0.94)        | -0.92(-2.16, 0.32)  |
| <i>p</i> value                              | 0.363               | 0.078               | 0.463                     | 0.993                     | 0.144               |
| >7 times/week*Group                         | 0.65(-0.69, 1.98)   | -0.34(-1.48, 0.79)  | -0.31(-2.05, 1.42)        | 0.76(-0.37, 1.89)         | -1.81(-3.30, -0.33) |
| <i>p</i> value                              | 0.343               | 0.550               | 0.723                     | 0.187                     | <b>0.017</b>        |
| <b>SSBs*Milk</b>                            |                     |                     |                           |                           |                     |
| <b>SSBs*Milk (N=314)</b>                    | -0.01(-0.08, 0.06)  | 0.01(-0.05, 0.07)   | 0.04(-0.05, 0.13)         | -0.00(-0.06, 0.05)        | 0.01(-0.06, 0.09)   |
| <i>p</i> value                              | 0.792               | 0.711               | 0.352                     | 0.883                     | 0.737               |
| <b>Group (N=314) <sup>b</sup></b>           | -0.01(-1.02, 1.01)  | -0.18(-1.04, 0.68)  | -2.12(-3.42, -0.82)       | -3.45(-4.30, -2.60)       | 2.34(1.21, 3.46)    |
| <i>p</i> value                              | 0.992               | 0.676               | <b>0.001</b>              | <b>&lt;0.001</b>          | <b>&lt;0.001</b>    |
| <b>SSBs*Milk*Group (N=314) <sup>f</sup></b> | 0.08(-0.01, 0.17)   | 0.02(-0.06, 0.10)   | -0.01(-0.13, 0.11)        | 0.05(-0.02, 0.13)         | -0.07(-0.17, 0.03)  |
| <i>p</i> value                              | 0.086               | 0.579               | 0.891                     | 0.172                     | 0.171               |

$\beta$  value (95% Confidence Interval) from linear regression represented the correlation between variables and emotional and behavioral problems. <sup>a</sup>: 0 time/week of SSBs intake is the reference group; <sup>b</sup>: ASD group is the reference group; <sup>c</sup>: 0 time/week\*Group is the reference group; <sup>d</sup>: 0-3 times/week of milk intake is the reference group; <sup>e</sup>: 0-3 times/week\*Group is the reference group; <sup>f</sup>: SSBs\*milk\*Group is the reference group. SSBs: Sugar-sweetened Beverages; FSIQ: Full Scale Intelligence Quotient; BMI: Body Mass Index; ASD: Autism Spectrum Disorder.
